# Supplementary material for: Reduced Face Preference in Infancy: A Developmental Precursor to Callous-Unemotional Traits?
Source: PubMed Central journal article supplement (PMC4510143; doi:10.1016/j.biopsych.2014.09.022), 2015-07-15
Supplement: mmc1.pdf [file mmc1.pdf]

## Reduced Face Preference in Infancy: A Developmental Precursor to Callous-Unemotional Traits?

### *Supplementary Information*

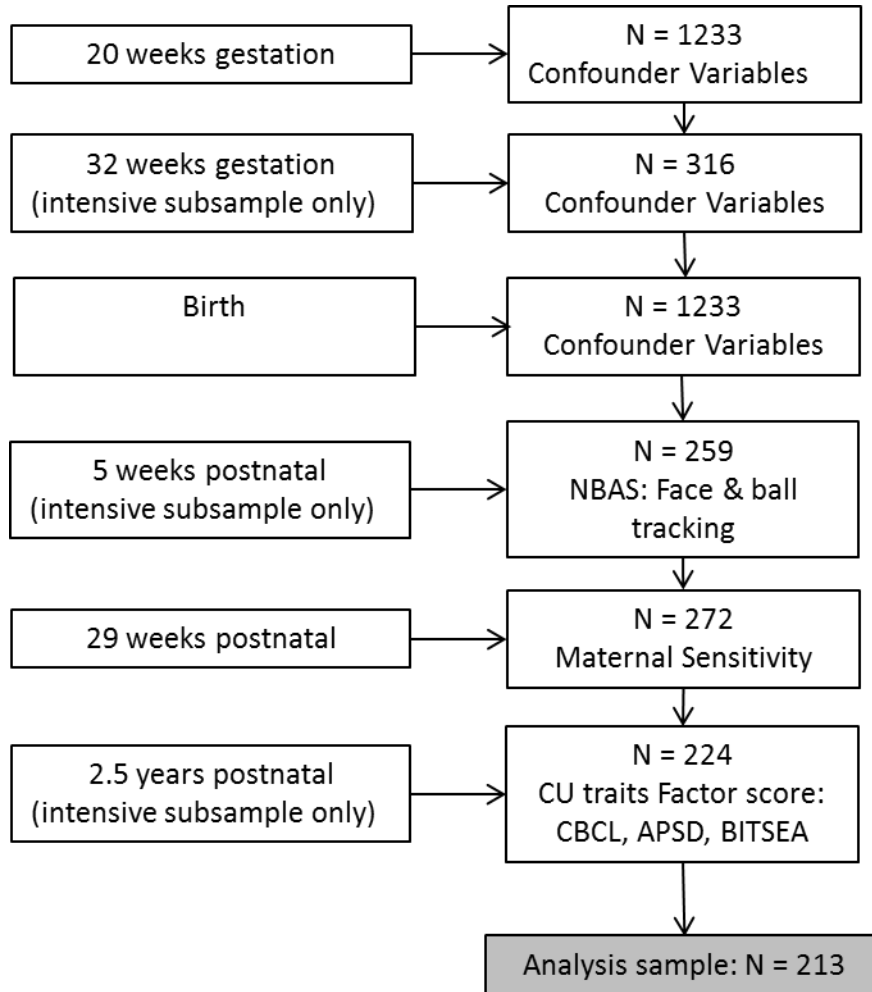

**Figure S1. Flow Diagram.** Participant numbers at each phase, and those entered into the final analysis.
